# Supplementary material for: The Expression Profile and Prognostic Significance of Metallothionein Genes in Colorectal Cancer
Source: MDPI journal article supplement (doi:10.3390/ijms20163849), 2019-08-07
Supplement: s1 [file s1]

**Title: The Expression Profile and Prognostic Significance of Metallothionein Genes in Colorectal Cancer**

Authors: Kuo-Chen Hung<sup>1</sup>, Tsui-Chin Huang<sup>2, 3,†</sup>, Chia-Hsiung Cheng<sup>4,†</sup>, Ya-Wen Cheng<sup>3,5,6,7</sup>, Ding-Yen Lin<sup>2,8</sup>, Jhen-Jia Fan<sup>9,10</sup>, Kuen-Haur Lee<sup>2,3,11,\*</sup>

<sup>1</sup>Division of Gastroenterologic Surgery, Department of Surgery, Yuan's General Hospital, Kaohsiung, Taiwan

<sup>2</sup>Ph.D. Program for Cancer Molecular Biology and Drug Discovery, College of Medical Science and Technology, Taipei Medical University, Taipei, Taiwan

<sup>3</sup>Graduate Institute of Cancer Biology and Drug Discovery, College of Medical Science and Technology, Taipei Medical University, Taipei, Taiwan

<sup>4</sup>Department of Biochemistry and Molecular Cell Biology, School of Medicine, College of Medicine, Taipei Medical University, Taipei, Taiwan

<sup>5</sup>Cancer Center, Taipei Medical University Hospital, Taipei Medical University, Taipei, Taiwan

<sup>6</sup>Translational Cancer Research Center, Taipei Medical University, Taipei, Taiwan

<sup>7</sup>Department of R&D, Calgent Biotechnology Co., Ltd, Taipei, Taiwan

<sup>8</sup>Department of Biotechnology and Bioindustry Sciences, College of Bioscience and Biotechnology, National Cheng Kung University, Tainan, Taiwan

<sup>9</sup>Institute of Biochemical Sciences, National Taiwan University, Taipei, Taiwan

<sup>10</sup>Food and Drug Administration, Ministry of Health and Welfare, Taipei, Taiwan

<sup>11</sup>Cancer Center, Wan Fang Hospital, Taipei Medical University

<sup>†</sup>These authors contributed equally to this work.

\*Corresponding author: Dr. Kuen-Haur Lee, Graduate Institute of Cancer Biology and Drug Discovery, College of Medical Science and Technology, Taipei Medical University, No. 250 Wu-Hsing Street, Taipei 11031, Taiwan. Tel: +886-2-27361661 ext. 7627, Fax: +886-2-66387537, E-mail: khlee@tmu.edu.tw

**Supplemental Information includes one Supplemental Table and 6 Supplemental Figures**

**Supplementary Information**

**Figure S1.** Survival analysis of CRC patients with SurvExpress ( $n=350$ ). High expression of MT1B (A), MT1F (B), MT1G (C), MT1H (D), MT1L (E), and MT1X (F) were correlated with low risk and good prognosis of CRC patients.

**Figure S2.** Kaplan–Meier curves according to any two-gene models. Clinical outcomes for the combinations of MT1B/MT1F (A), MT1B/MT1G (B), MT1B/MT1H (C), MT1B/MT1L (D), MT1B/MT1X (E), MT1F/MT1G (F), MT1F/MT1H (G), MT1F/MT1L (H), MT1F/MT1X (I), MT1G/MT1H (J), MT1G/MT1L (K), MT1G/MT1X (L), MT1H/MT1L (M), MT1H/MT1X (N), and MT1L/MT1X (O) mRNA status of CRC patients.

**Figure S3.** Kaplan–Meier curves according to any three-gene models. Clinical outcomes for the combinations of MT1B/MT1F/MT1G (A), MT1B/MT1F/MT1H (B), MT1B/MT1F/MT1L (C), MT1B/MT1F/MT1X (D), MT1B/MT1G/MT1H (E), MT1B/MT1G/MT1L (F), MT1B/MT1G/MT1X (G), MT1B/MT1H/MT1L (H), MT1B/MT1H/MT1X (I), MT1B/MT1L/MT1X (J), MT1F/MT1G/MT1H (K), MT1F/MT1G/MT1L (L), MT1F/MT1G/MT1X (M), MT1F/MT1H/MT1L (N), MT1F/MT1H/MT1X (O), MT1F/MT1L/MT1X (P), MT1G/MT1H/MT1L (Q), MT1G/MT1H/MT1X (R), MT1G/MT1L/MT1X (S), and MT1H/MT1L/MT1X (T) mRNA status of CRC patients.

**Figure S4.** Kaplan–Meier curves according to any four-gene models. Clinical outcomes for the combinations of MT1B/MT1F/MT1G/MT1H (A), MT1B/MT1F/MT1G/MT1L (B), MT1B/MT1F/MT1G/MT1X (C), MT1B/MT1F/MT1H/MT1L (D), MT1B/MT1F/MT1H/MT1X (E), MT1B/MT1F/MT1L/MT1X (F), MT1B/MT1G/MT1H/MT1L (G), MT1B/MT1G/MT1H/MT1X (H), MT1B/MT1G/MT1L/MT1X (I), MT1B/MT1H/MT1L/MT1X (J), MT1F/MT1G/MT1H/MT1L (K),

MT1F/MT1G/MT1H/MT1X (L), MT1F/MT1H/MT1L/MT1X (M), and MT1G/MT1H/MT1L/MT1X (N) mRNA status of CRC patients..

**Figure S5.** Kaplan–Meier curves according to any five- and six-gene models. Clinical outcomes for the combinations of MT1B/MT1F/MT1G/MT1H/MT1L (A), MT1B/MT1F/MT1G/MT1H/MT1X (B), MT1B/MT1F/MT1G/MT1L/MT1X (C), MT1B/MT1F/MT1H/MT1L/MT1X (D), MT1B/MT1G/MT1H/MT1L/MT1X (E), MT1F/MT1G/MT1H/MT1L/MT1X (F), and MT1B/MT1F/MT1G/MT1H/MT1L/MT1X (G) mRNA status of CRC patients.

**Supplementary Table 1. Top 20 down-regulated genes in CRC**

| <b>T/N ratio</b> | <b>GENE_SYMBOL</b> | <b>GENE_NAME</b>                                                                   |
|------------------|--------------------|------------------------------------------------------------------------------------|
| 0.01             | GUCA2B             | guanylate cyclase activator 2B (uroguanylin)                                       |
| 0.03             | B3GNT7             | UDP-GlcNAc:betaGal<br>beta-1,3-N-acetylglucosaminyltransferase 7                   |
| 0.05             | CA7                | carbonic anhydrase VII                                                             |
| 0.14             | B3GNT7             | UDP-GlcNAc:betaGal<br>beta-1,3-N-acetylglucosaminyltransferase 7                   |
| 0.14             | MUC4               | mucin 4, cell surface associated                                                   |
| 0.15             | MT1F               | metallothionein 1F                                                                 |
| 0.20             | MT1G               | metallothionein 1G                                                                 |
| 0.21             | LOC344887          | NmrA-like family domain containing 1<br>pseudogene                                 |
| 0.21             | MT1X               | metallothionein 1X                                                                 |
| 0.21             | MT1H               | metallothionein 1H                                                                 |
| 0.22             | MT1B               | metallothionein 1B                                                                 |
| 0.22             | MT1L               | metallothionein 1L (gene/pseudogene)                                               |
| 0.24             | SLC35C2            | solute carrier family 35, member C2                                                |
| 0.24             | UBE2H              | ubiquitin-conjugating enzyme E2H                                                   |
| 0.24             | ADAMDEC1           | ADAM-like, decysin 1                                                               |
| 0.24             | ITM2A              | integral membrane protein 2A                                                       |
| 0.24             | MIR22HG            | MIR22 host gene (non-protein coding)                                               |
| 0.25             | LOC100507053       | uncharacterized LOC100507053                                                       |
| 0.25             | KLF4               | Kruppel-like factor 4 (gut)                                                        |
| 0.26             | SEMA6D             | sema domain, transmembrane domain (TM),<br>and cytoplasmic domain, (semaphorin) 6D |
| 0.26             | PDE4D              | phosphodiesterase 4D, cAMP-specific                                                |

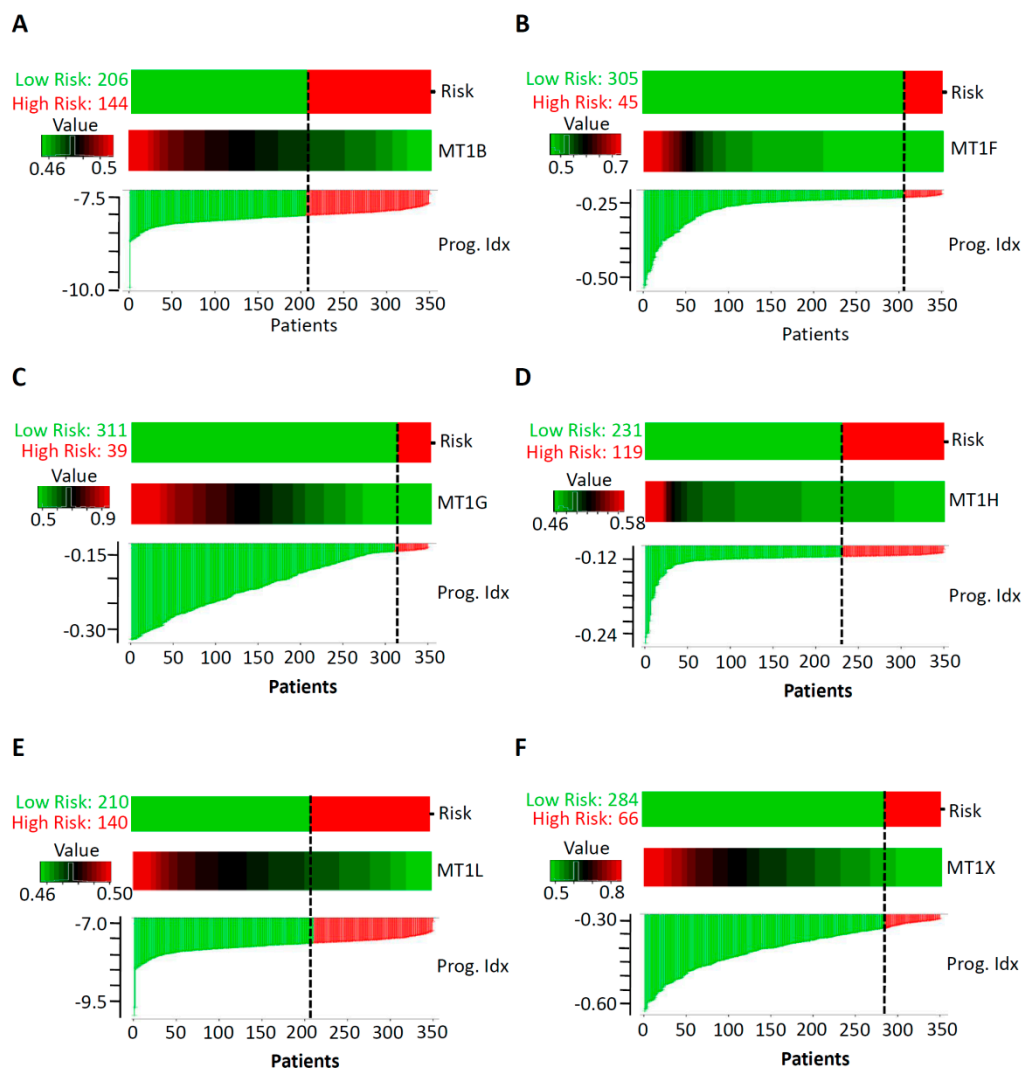

**Supplementary Fig. 1**

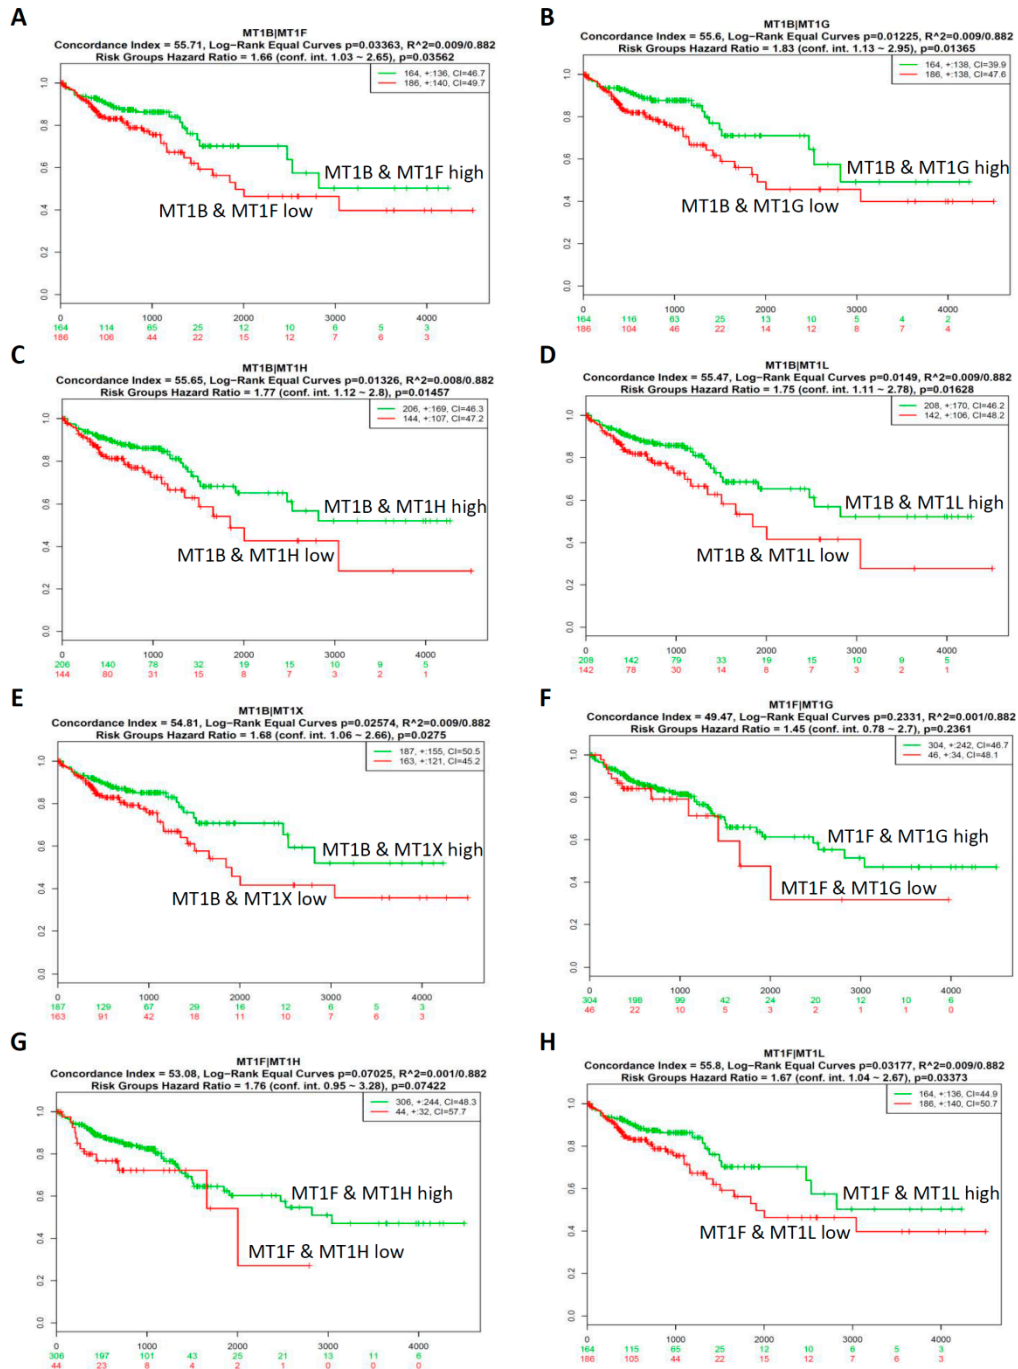

Supplementary Fig. 2

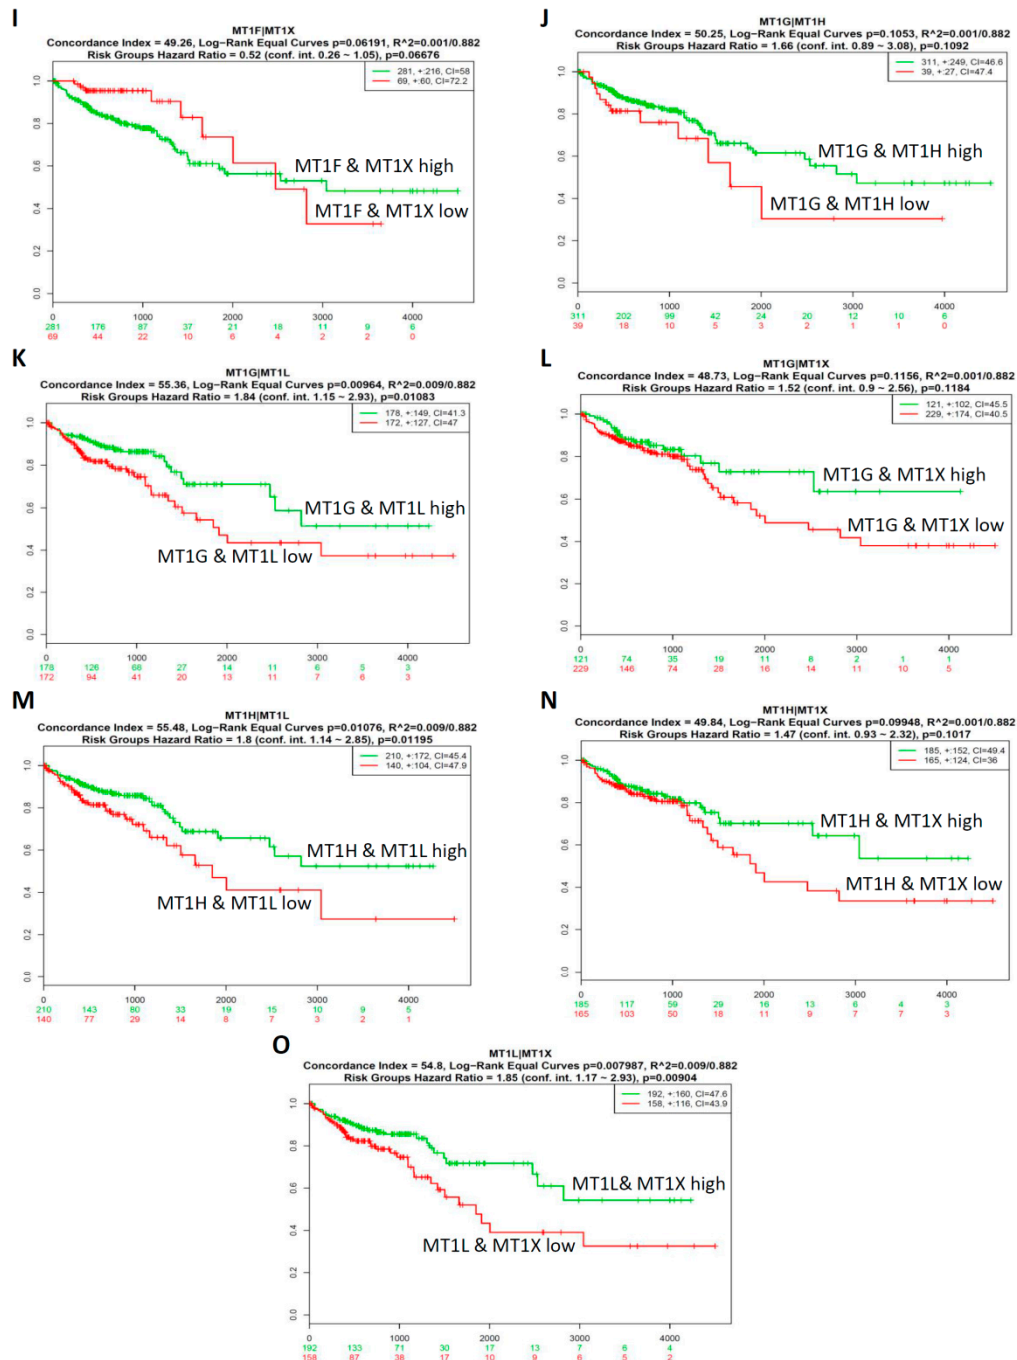

Supplementary Fig. 2 (Continue)

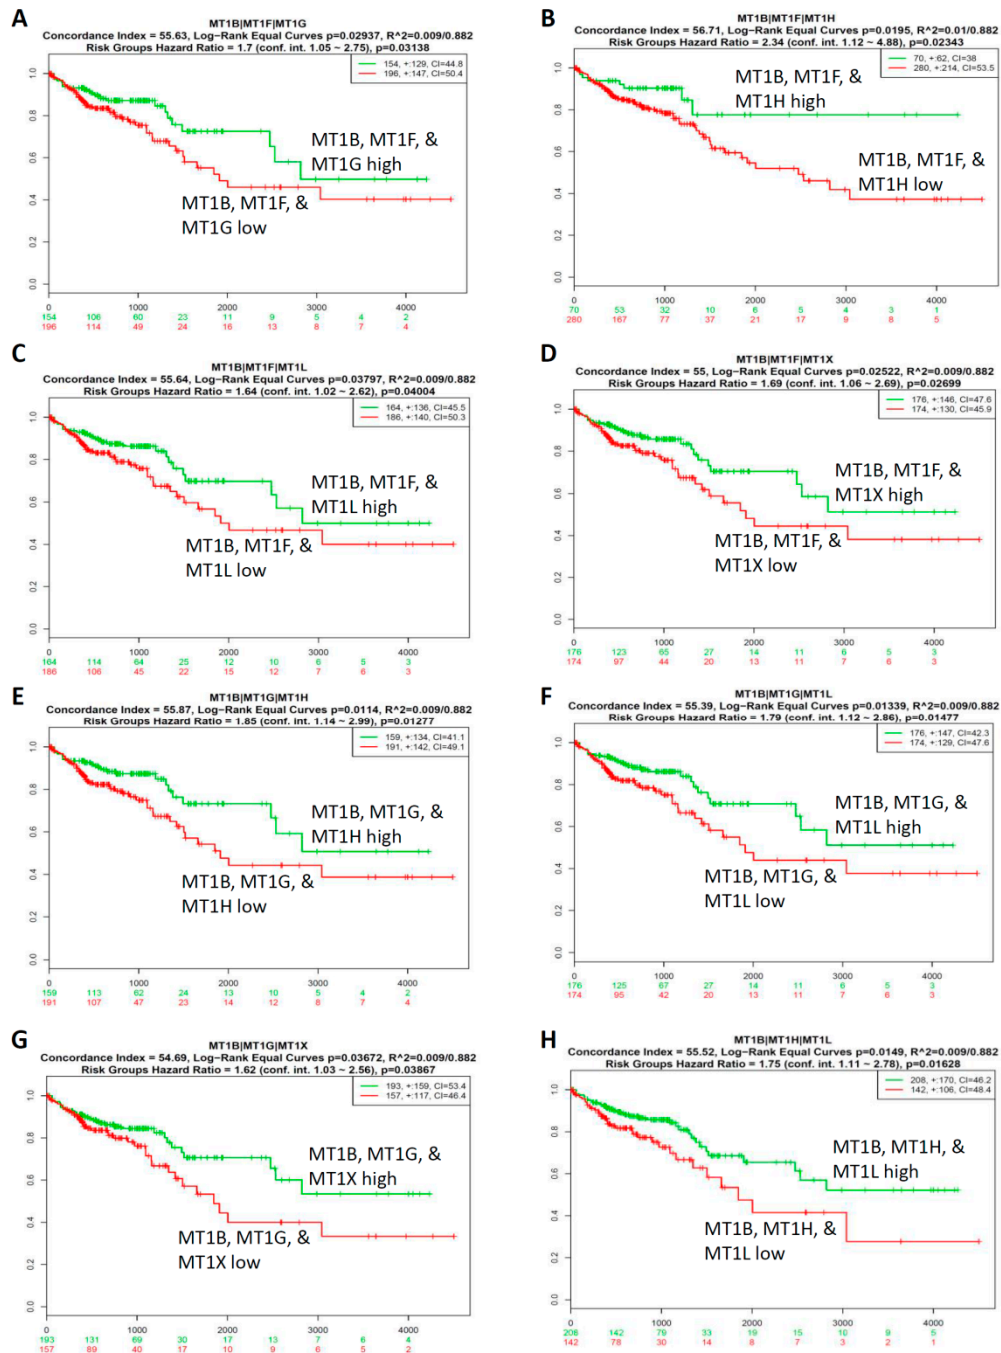

**Supplementary Fig. 3**

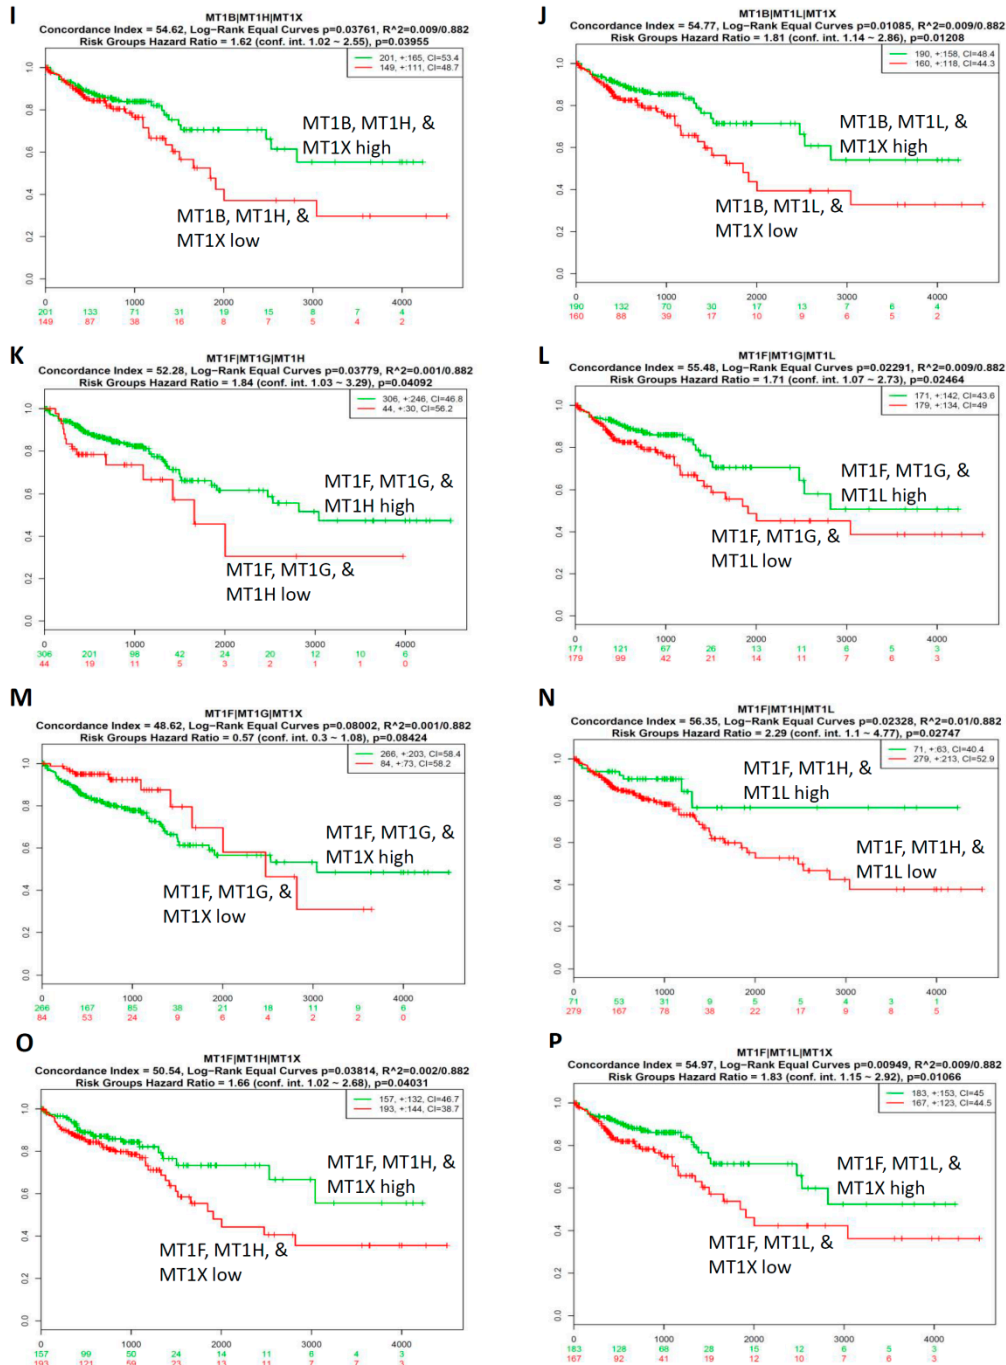

Supplementary Fig. 3 (Continue)

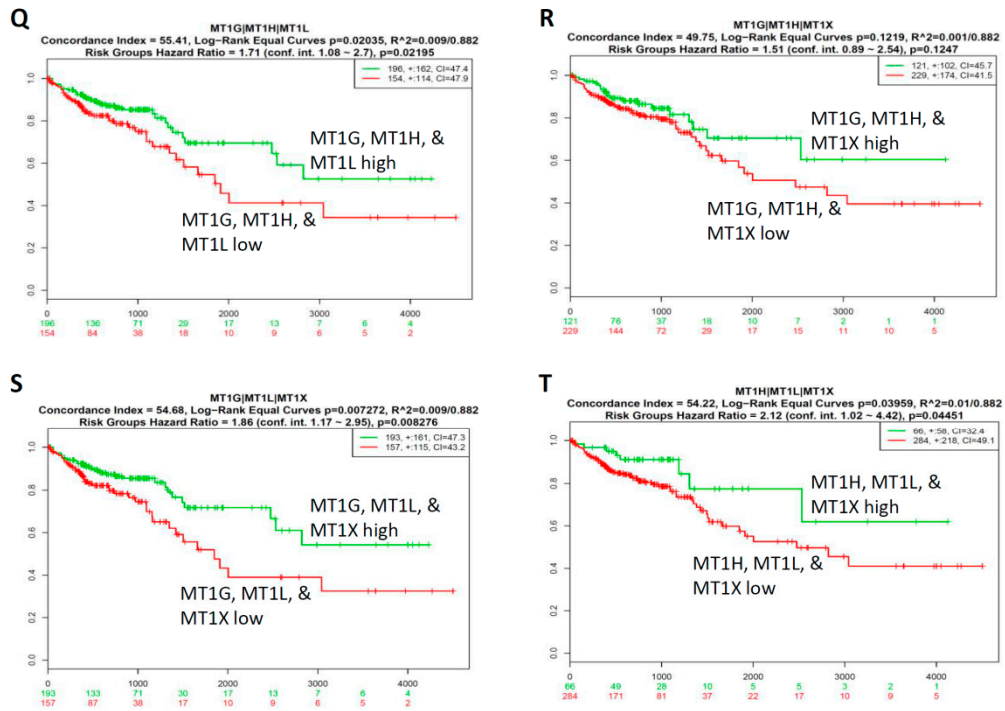

**Supplementary Fig. 3 (Continue)**

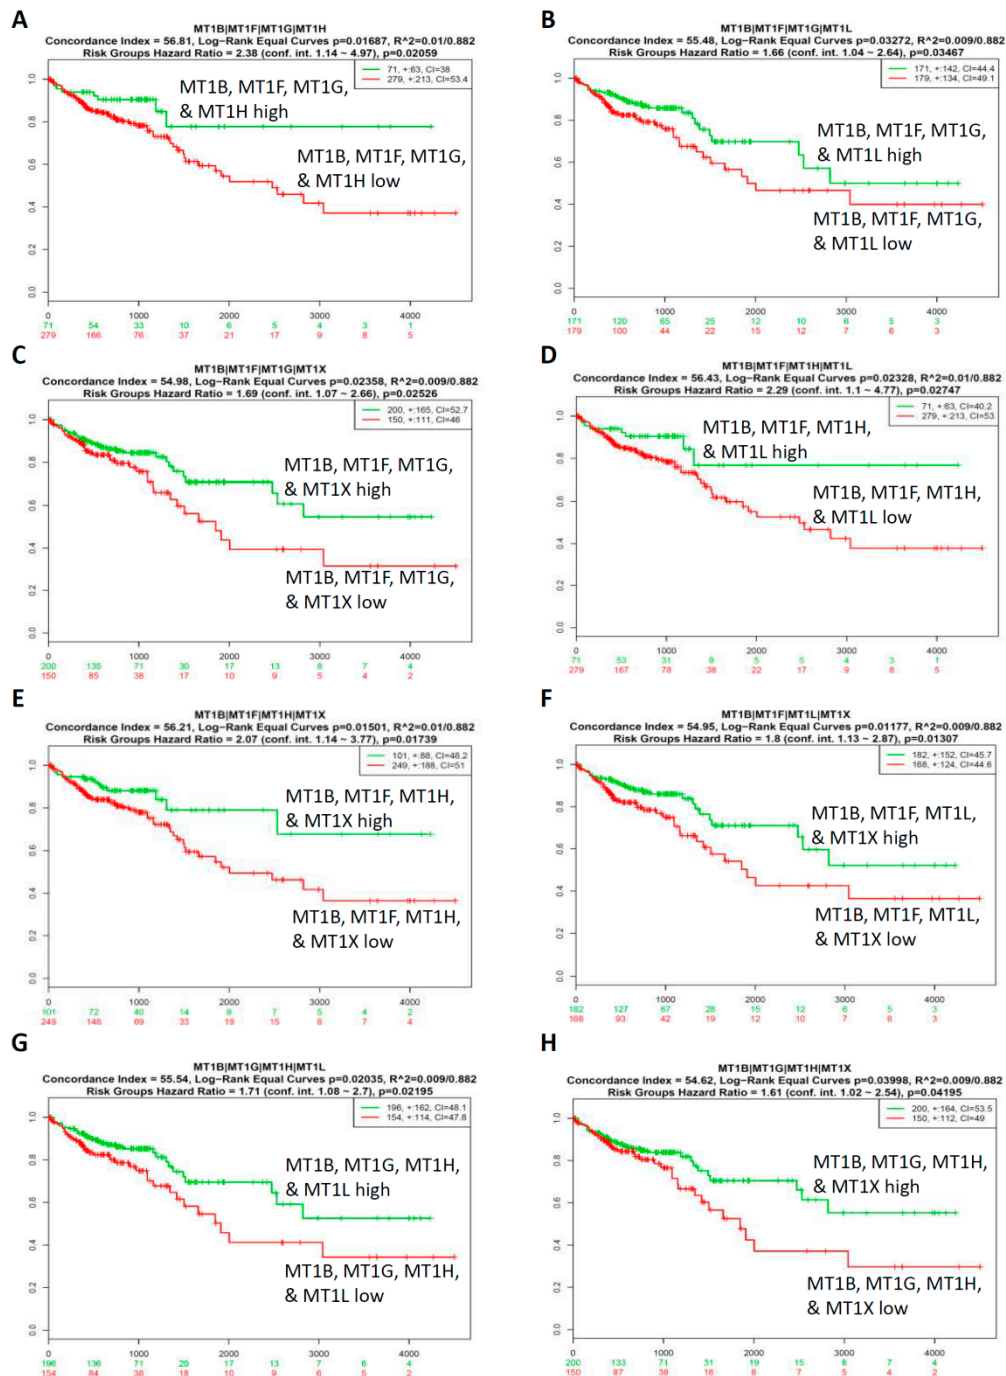

**Supplementary Fig. 4**

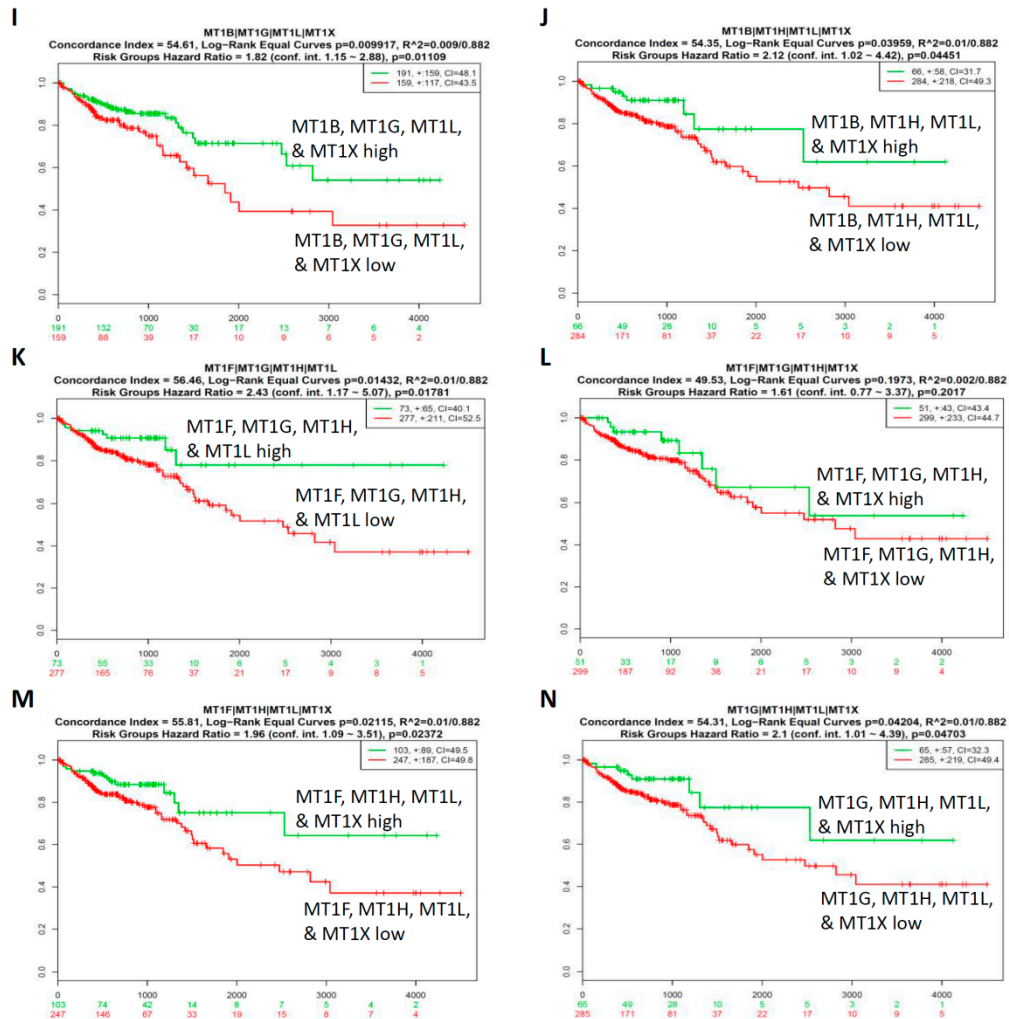

Supplementary Fig. 4 (Continue)

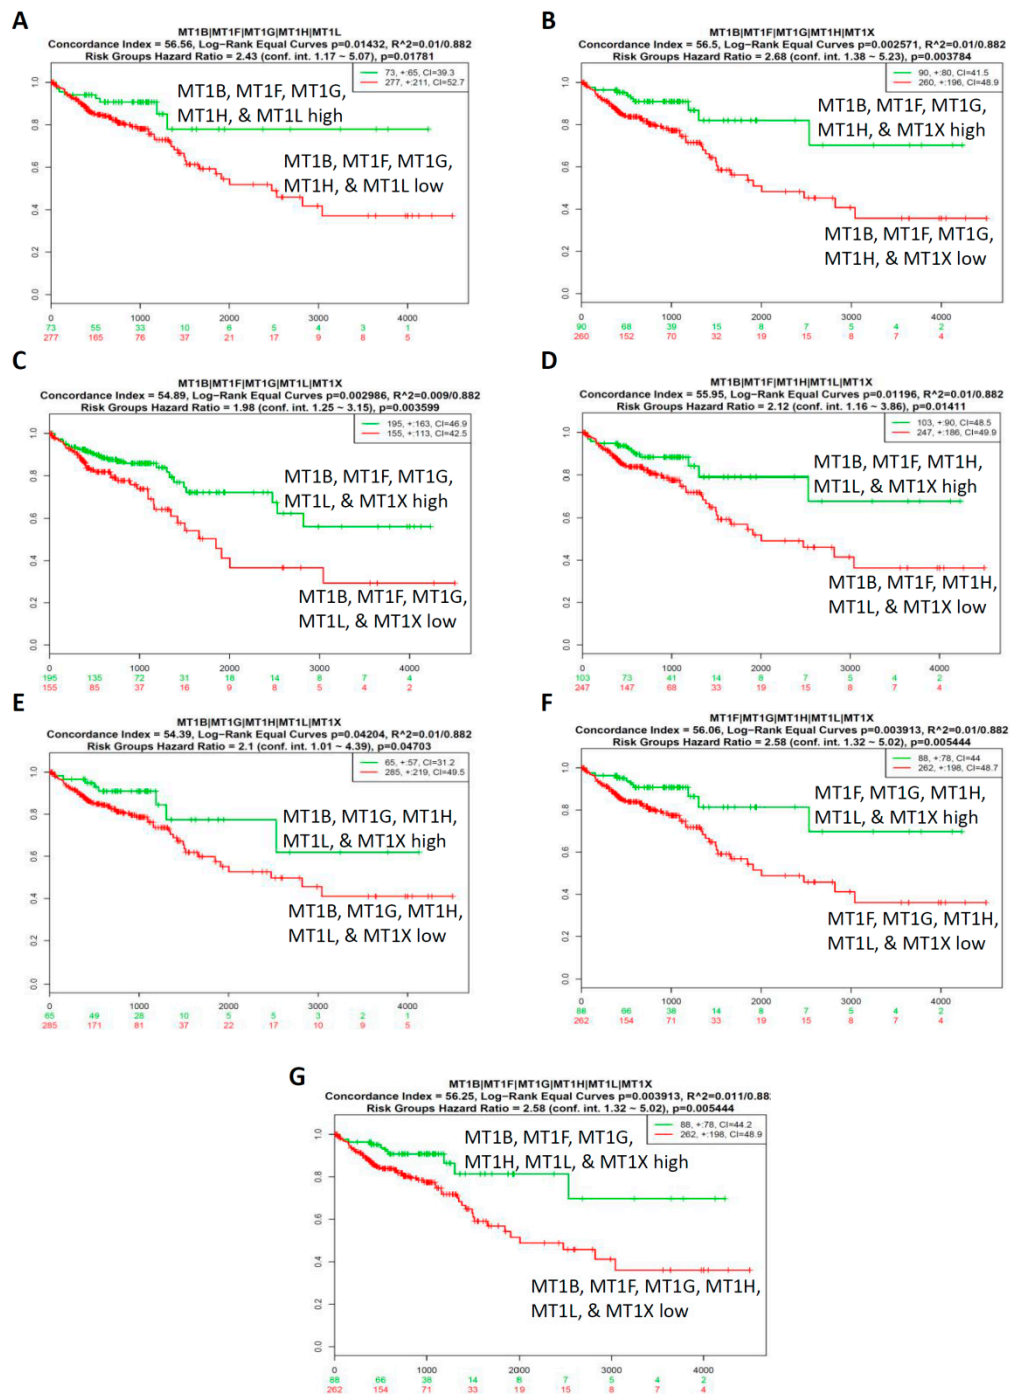

**Supplementary Fig. 5**
